# Supplementary material for: Northward Range Expansion of Water Deer in Northeast Asia: Direct Evidence and Management Implications
Source: MDPI journal article supplement (doi:10.3390/ani12111392), 2022-05-28
Supplement: s1 [file s1]

## SUPPLEMENTARY MATERIALS

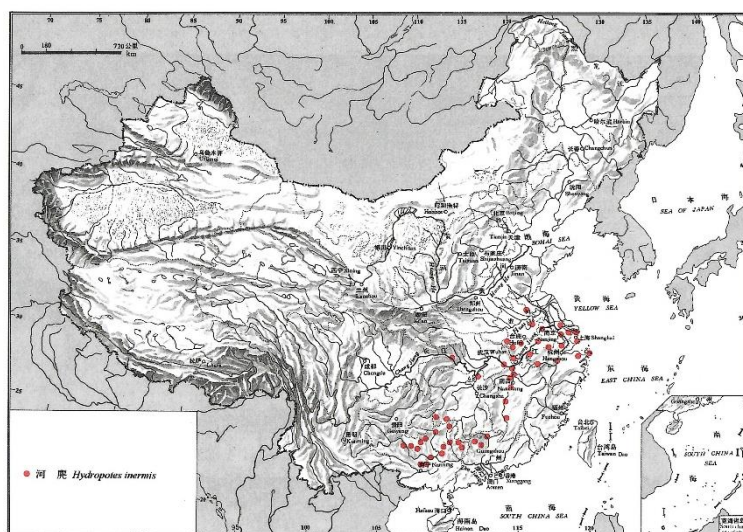

**Figure S1.** The geographical distribution of the Chinese water deer *Hydropotes inermis inermis* before 1990s according to Zhang (1997). Red points approximately mark regions of occurrences. Data were collected from the following sources: (1) Early publications, of which the most important are: N. Kuroda (1940), *Picture Album of Japanese Mammals*; Allen, G. M., *The Mammals of China and Mongolia* (1938-1940); Ellerman, J. R. and J. C. S. Morrison-Scott (1950), *Checklist of Palaearctic and Indian Mammals*; Loukashkin, A. S (1937), *Wild Mammals of Northern Manchuria*; Bobrinskii, N. A., B. A. Kuznechov and A. P. Kuzakin (1944), *Identification of Mammals of U. S. S. R*; Ognev, S. E. (1928-1950), *Beasts of U. S. S. R. and Its Adjacent Countries* (Vol. 1-7), ed. Shou Zhenhuang (1958), *Survey Report of Mammals in Northeast China* chief; Shou Zhenhuang (1962), *Fauna Economica of China-Mammalia*; Qian Yanwen et al (1965), *The Birds and Beasts of Southern Xinjiang; Mammals*. (2) Information on faunal investigations and records of specimens, contributed by integrated scientific expeditions of Academia Sinica since the 1950s; (3) Publications about mammals at provincial level for the past two decades: Ma Yiqing (chief ed. ) (1986), *Fauna of Heilongjiang-Mammalia*; Xiao Zhenggu (chief ed. ) (1988), *Fauna of Liaoning-Mammals*; Wang Qishan (chief ed. ) (1990), *Mammal Fauna of Anhui*; Zhuge Yang (chief ed. ) (1988), *Fauna of Zhejiang-Mammalia*; Hu Jinzhu and Wang Youzi (1982, 1984), *Sichuan Fauna Economica-Mammalia*; Luo Ren (chief ed.) (1993), *The Mammals of Guizhou*; Sheng Lantian et al. (1988), *Vertebrate List of Guangxi-Mammalia*; Feng Zuojian et al (1986), *The mammals of Xizang*; Xu Longhui et al (1983), *The Birds and Beasts of Hainan*; Li Dehao et al (1989), *The Economic Vertebrates of Qinghai*; Wang Xiantin (chief ed.) (1991), *Vertebrate Fauna of Gansu*; Wang Shibo et al (1983), *Rodentia Fauna of Xinjiang*; Ma Yong et al (1987), *Glires (Rodents and Lagomorphs of Northern Xinjiang and Their Zoogeographical Distribution*; Wang Tingzheng and Xu Wenxian (chief ed. ) (1992), *Glires (Rodentia and Lagomorpha) Fauna of Shaanxi Province*; Gao Yaoting et al. (1987), *Fauna Sinica: Mammalia-Vol. 8:*

*Carnivora*; Xu Yongchun et al (1987); *Integrated Scientific Report of Xishuangbanna Nature Reserves*; Yin Binggao et al. (1991), *Wildlife Protection in Tibet*; Wu Zhengyi et al. (1983), *Research of Forest Ecosystems on Ailao Mountains, Yunnan*.

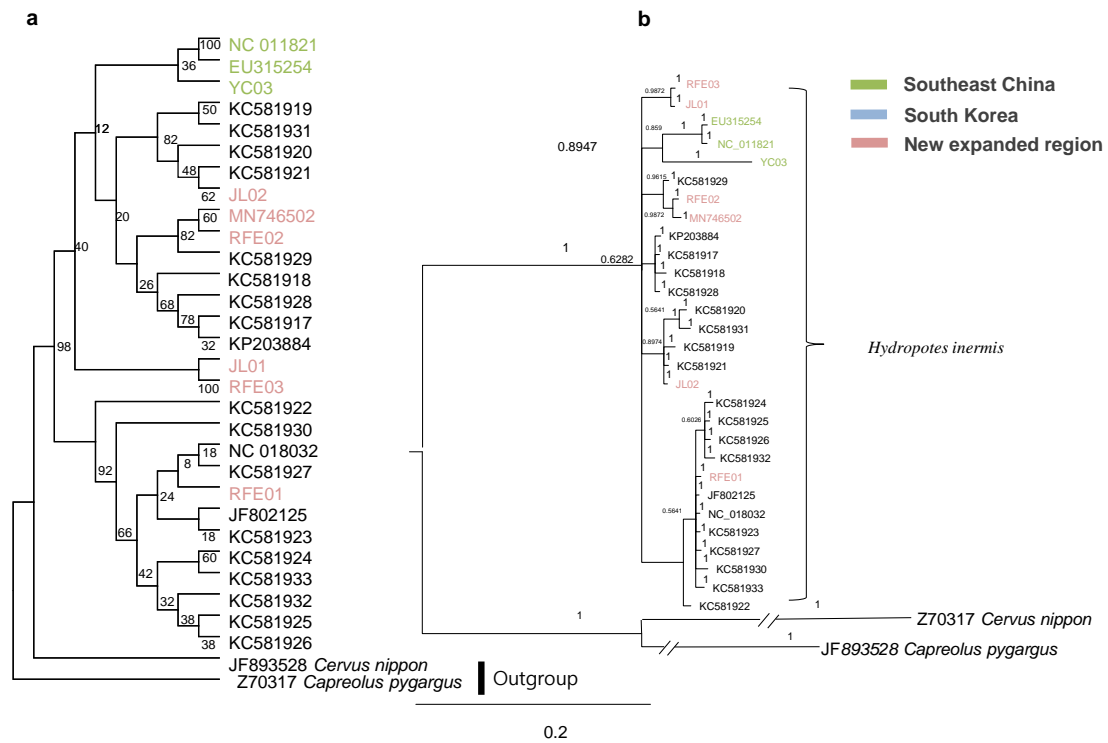

**Figure S2. Maximum likelihood and Bayesian inference trees based on control region data from water deer and two outgroups (a: Maximum likelihood tree; b: Bayesian inference tree).** The jModelTest v 2.1.7 (Guindon and Gascuel, 2003; Darriba et al., 2012) provided the best fit substitution model for each phylogenetic tree reconstruction. Independent phylogenetic trees were constructed for cytochrome b and D-loop sequences. Software MEGA was used to construct the maximum likelihood phylogenetic tree with 1,000 bootstraps (Tamura et al., 2011). The Bayesian Inference(BI) tree was constructed using the MrBayes v 3.2.7 (Ronquist et al., 2012). Siberian roe deer (*Capreolus pygargus*) and sika deer (*Cervus nippon*) were used as outgroups (GenBank accession no. Z70317; JF893528) during phylogenetic analysis.

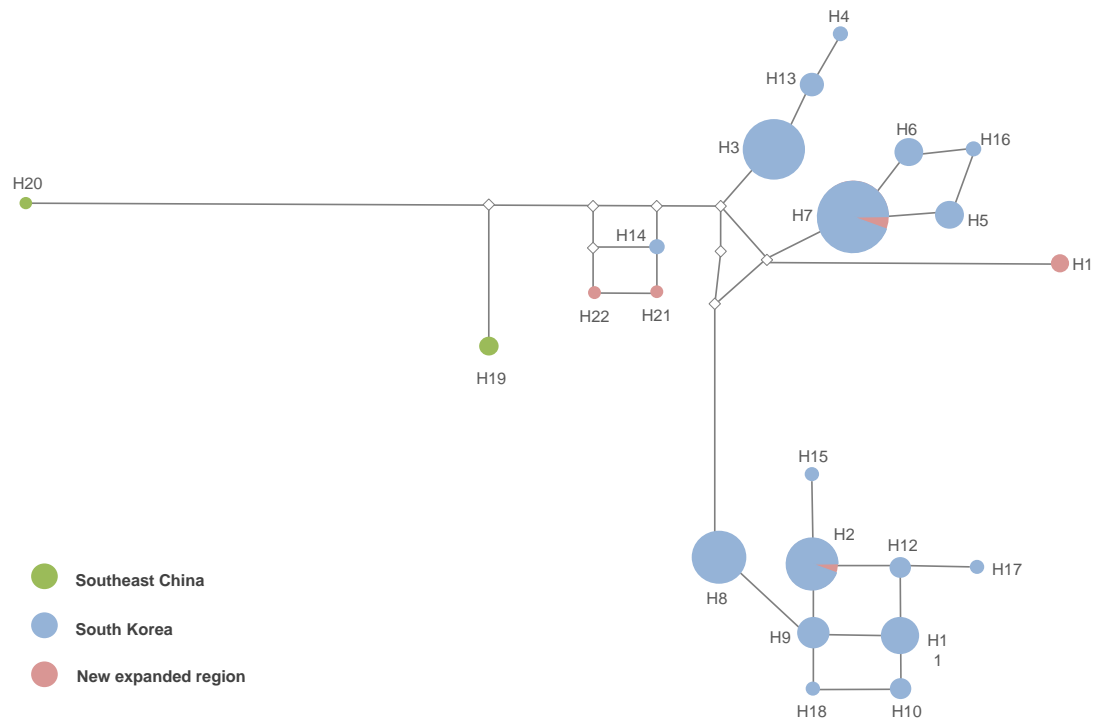

**Figure S3. Median-joining network (MJN) analysis with control region haplotypes of water deer.** median-joining network (MJN) of water deer haplotypes (D-loop sequence) using the program Network v 10 (Bandelt et al., 1999) to visualize the relationship among populations.

**Table S1.** Water deer sample information for genetic analysis.

| Sample ID | Area                                         | Location                | Sample type | Date       | Notes                     |
|-----------|----------------------------------------------|-------------------------|-------------|------------|---------------------------|
| JL01      | Bolidong, Hunchun, Jilin Province, China     | E 130.44102, N 42.55645 | Tissue      | 2019-7     | Roadkill                  |
| JL02      | Baliancheng, Hunchun, Jilin Province, China  | E 130.26988, N 42.87993 | Tissue      | 2019-5     | Roadkill                  |
| RFE01     | Khasansky district of Primorsky Krai, Russia | E 130.47771, N 42.33729 | Tissue      | 2019-12-11 | Hunted as roe deer        |
| RFE02     | Khasansky district of Primorsky Krai, Russia | E 130.43504, N 42.34924 | Tissue      | 2019-12-25 | Hunted as roe deer        |
| RFE03     | Khasansky district of Primorsky Krai, Russia | E 130.65602, N 42.41273 | Tissue      | 2020-2-15  | Confiscated from poaching |
